# Supplementary material for: Phase behaviour of hard board-like particles
Source: Royal Society of Chemistry journal article supplement (doi:10.1039/c7sm00726d), 2017-01-01

## Phase behaviour of hard board-like particles

Alejandro Cuetos, Matthew Dennison, Andrew Masters, and Alessandro Patti

### Supplementary Information

Table 1. Reduced pressure, packing fraction, uniaxial and biaxial order parameters of HBPs with  $L^*=9$  and  $W^*=1$ . Absolute errors are lower than  $5 \cdot 10^{-3}$

| Phase        | $P^*$  | $\eta$ | $S_{2,L}$ | $S_{2,T}$ | $S_{2,W}$ | $B_2$ |
|--------------|--------|--------|-----------|-----------|-----------|-------|
| I            | 0.150  | 0.202  | 0.010     | 0.010     | 0.010     | 0.010 |
| I            | 0.200  | 0.230  | 0.020     | 0.020     | 0.020     | 0.011 |
| I            | 0.250  | 0.252  | 0.050     | 0.030     | 0.030     | 0.011 |
| I            | 0.270  | 0.262  | 0.030     | 0.030     | 0.030     | 0.010 |
| I            | 0.280  | 0.268  | 0.020     | 0.030     | 0.010     | 0.010 |
| $N^+$        | 0.300  | 0.302  | 0.830     | 0.220     | 0.220     | 0.001 |
| $N^+$        | 0.310  | 0.308  | 0.850     | 0.220     | 0.220     | 0.010 |
| $N^+$        | 0.320  | 0.315  | 0.880     | 0.220     | 0.220     | 0.010 |
| $N^+$        | 0.340  | 0.327  | 0.901     | 0.235     | 0.235     | 0.020 |
| $N^+$        | 0.350  | 0.331  | 0.905     | 0.237     | 0.237     | 0.010 |
| $N^+$        | 0.370  | 0.342  | 0.920     | 0.250     | 0.250     | 0.010 |
| $N^+$        | 0.390  | 0.352  | 0.935     | 0.248     | 0.248     | 0.010 |
| $N^+$        | 0.410  | 0.361  | 0.945     | 0.250     | 0.250     | 0.010 |
| $N^+$        | 0.440  | 0.377  | 0.960     | 0.255     | 0.255     | 0.020 |
| $Sm^+$       | 0.480  | 0.402  | 0.972     | 0.257     | 0.257     | 0.015 |
| $Sm^+$       | 0.490  | 0.408  | 0.974     | 0.260     | 0.255     | 0.015 |
| $Sm^+$       | 0.500  | 0.412  | 0.975     | 0.260     | 0.260     | 0.015 |
| $Sm^+$       | 0.530  | 0.434  | 0.978     | 0.260     | 0.260     | 0.015 |
| $Sm^+$       | 0.550  | 0.443  | 0.981     | 0.261     | 0.261     | 0.017 |
| $Sm^+$       | 0.650  | 0.482  | 0.987     | 0.265     | 0.265     | 0.015 |
| $Sm^+$       | 0.750  | 0.525  | 0.991     | 0.260     | 0.257     | 0.015 |
| $Sm^+$       | 0.800  | 0.551  | 0.993     | 0.260     | 0.260     | 0.013 |
| $Sm^+$       | 0.850  | 0.566  | 0.993     | 0.260     | 0.260     | 0.013 |
| $Sm^+$       | 0.900  | 0.595  | 0.996     | 0.270     | 0.270     | 0.028 |
| $Sm^+/Col^+$ | 1.000  | 0.620  | 0.997     | 0.254     | 0.254     | 0.004 |
| $Col^+$      | 1.500  | 0.711  | 0.999     | 0.991     | 0.991     | 0.988 |
| $Col^+$      | 2.000  | 0.765  | 1.000     | 0.995     | 0.995     | 0.993 |
| $Col^+$      | 2.500  | 0.803  | 1.000     | 0.996     | 0.996     | 0.995 |
| $Col^+$      | 3.000  | 0.830  | 1.000     | 0.998     | 0.998     | 0.997 |
| $Col^+$      | 4.000  | 0.865  | 1.000     | 0.998     | 0.998     | 0.998 |
| $Col^+$      | 5.000  | 0.890  | 0.999     | 0.999     | 0.999     | 0.999 |
| K            | 7.500  | 0.924  | 1.000     | 1.000     | 1.000     | 0.998 |
| K            | 10.000 | 0.941  | 1.000     | 1.000     | 1.000     | 0.998 |

**Table 2. Reduced pressure, packing fraction, uniaxial and biaxial order parameters of HBPs with  $L^*=9$  and  $W^*=2$ . Absolute errors are lower than  $5 \cdot 10^{-3}$**

| Phase   | $P^*$  | $\eta$ | $S_{2,L}$ | $S_{2,T}$ | $S_{2,W}$ | $B_2$ |
|---------|--------|--------|-----------|-----------|-----------|-------|
| I       | 0.070  | 0.207  | 0.001     | 0.001     | 0.001     | 0.001 |
| I       | 0.100  | 0.238  | 0.020     | 0.020     | 0.020     | 0.020 |
| I       | 0.160  | 0.287  | 0.040     | 0.025     | 0.022     | 0.010 |
| I       | 0.175  | 0.300  | 0.050     | 0.020     | 0.020     | 0.020 |
| I       | 0.200  | 0.319  | 0.087     | 0.023     | 0.040     | 0.010 |
| I       | 0.215  | 0.332  | 0.084     | 0.051     | 0.032     | 0.005 |
| I       | 0.220  | 0.336  | 0.100     | 0.050     | 0.050     | 0.000 |
| $N^+$   | 0.221  | 0.357  | 0.760     | 0.215     | 0.185     | 0.010 |
| $N^+$   | 0.225  | 0.366  | 0.840     | 0.235     | 0.210     | 0.012 |
| $N^+$   | 0.230  | 0.372  | 0.850     | 0.240     | 0.220     | 0.010 |
| $Sm^+$  | 0.235  | 0.388  | 0.865     | 0.223     | 0.223     | 0.010 |
| $Sm^+$  | 0.240  | 0.391  | 0.530     | 0.220     | 0.210     | 0.001 |
| $Sm^+$  | 0.300  | 0.458  | 0.950     | 0.250     | 0.250     | 0.005 |
| $Sm^+$  | 0.350  | 0.492  | 0.938     | 0.250     | 0.240     | 0.005 |
| $Sm^+$  | 0.400  | 0.533  | 0.988     | 0.269     | 0.269     | 0.016 |
| $Sm^+$  | 0.450  | 0.567  | 0.990     | 0.270     | 0.270     | 0.031 |
| $Sm^+$  | 0.500  | 0.599  | 0.992     | 0.281     | 0.281     | 0.036 |
| $Sm^+$  | 0.550  | 0.643  | 0.995     | 0.972     | 0.972     | 0.965 |
| $Col^-$ | 0.600  | 0.662  | 0.995     | 0.987     | 0.985     | 0.982 |
| $Col^-$ | 0.700  | 0.693  | 0.997     | 0.991     | 0.989     | 0.988 |
| $Col^+$ | 0.800  | 0.720  | 0.998     | 0.993     | 0.992     | 0.990 |
| $Col^+$ | 0.900  | 0.747  | 0.998     | 0.994     | 0.993     | 0.992 |
| $Col^+$ | 1.300  | 0.809  | 0.999     | 0.998     | 0.997     | 0.997 |
| $Col^+$ | 1.500  | 0.828  | 0.999     | 0.998     | 0.998     | 0.998 |
| $Col^+$ | 2.000  | 0.865  | 1.000     | 0.999     | 0.999     | 0.999 |
| $Col^+$ | 3.000  | 0.906  | 1.000     | 0.999     | 0.999     | 0.999 |
| K       | 5.000  | 0.942  | 1.000     | 1.000     | 1.000     | 1.000 |
| K       | 10.000 | 0.971  | 1.000     | 1.000     | 1.000     | 1.000 |

**Table 3. Reduced pressure, packing fraction, uniaxial and biaxial order parameters of HBPs with  $L^*=9$  and  $W^*=3$ . Absolute errors are lower than  $5 \cdot 10^{-3}$**

| Phase            | $P^*$ | $\eta$ | $S_{2,L}$ | $S_{2,T}$ | $S_{2,W}$ | $B_2$ |
|------------------|-------|--------|-----------|-----------|-----------|-------|
| I                | 0.040 | 0.193  | 0.025     | 0.028     | 0.020     | 0.005 |
| I                | 0.050 | 0.212  | 0.030     | 0.028     | 0.018     | 0.010 |
| I                | 0.100 | 0.280  | 0.040     | 0.040     | 0.022     | 0.015 |
| I                | 0.150 | 0.340  | 0.060     | 0.050     | 0.040     | 0.015 |
| I                | 0.160 | 0.351  | 0.070     | 0.065     | 0.030     | 0.015 |
| I                | 0.162 | 0.354  | 0.050     | 0.050     | 0.030     | 0.015 |
| I                | 0.163 | 0.355  | 0.070     | 0.070     | 0.070     | 0.030 |
| Sm <sup>+</sup>  | 0.164 | 0.399  | 0.802     | 0.220     | 0.225     | 0.020 |
| Sm <sup>+</sup>  | 0.165 | 0.395  | 0.785     | 0.220     | 0.220     | 0.020 |
| Sm <sup>+</sup>  | 0.167 | 0.410  | 0.850     | 0.230     | 0.250     | 0.010 |
| Sm <sup>+</sup>  | 0.170 | 0.419  | 0.930     | 0.260     | 0.265     | 0.015 |
| Sm <sup>+</sup>  | 0.200 | 0.461  | 0.965     | 0.260     | 0.260     | 0.015 |
| Sm <sup>+</sup>  | 0.250 | 0.518  | 0.980     | 0.280     | 0.280     | 0.000 |
| Sm <sup>+</sup>  | 0.300 | 0.571  | 0.989     | 0.295     | 0.295     | 0.006 |
| Sm <sup>+</sup>  | 0.330 | 0.598  | 0.990     | 0.357     | 0.357     | 0.137 |
| Col <sup>l</sup> | 0.380 | 0.645  | 0.992     | 0.957     | 0.954     | 0.927 |
| Col <sup>l</sup> | 0.400 | 0.657  | 0.993     | 0.977     | 0.974     | 0.979 |
| Col <sup>l</sup> | 0.450 | 0.683  | 0.994     | 0.988     | 0.986     | 0.954 |
| K                | 0.500 | 0.706  | 0.995     | 0.990     | 0.988     | 0.961 |
| K                | 0.600 | 0.723  | 0.990     | 0.993     | 0.985     | 0.989 |

**Table 4. Reduced pressure, packing fraction, uniaxial and biaxial order parameters of HBPs with  $L^*=9$  and  $W^*=3.5$ . Absolute errors are lower than  $5 \cdot 10^{-3}$**

| Phase     | $P^*$ | $\eta$ | $S_{2,L}$ | $S_{2,T}$ | $S_{2,W}$ | $B_2$ |
|-----------|-------|--------|-----------|-----------|-----------|-------|
| I         | 0.110 | 0.315  | 0.000     | 0.000     | 0.000     | 0.000 |
| I         | 0.130 | 0.342  | 0.050     | 0.090     | 0.010     | 0.010 |
| I         | 0.140 | 0.356  | 0.060     | 0.060     | 0.030     | 0.030 |
| I         | 0.143 | 0.363  | 0.050     | 0.050     | 0.030     | 0.030 |
| I         | 0.145 | 0.366  | 0.040     | 0.050     | 0.038     | 0.030 |
| I         | 0.147 | 0.370  | 0.050     | 0.060     | 0.030     | 0.030 |
| $N^-$     | 0.150 | 0.390  | 0.200     | 0.490     | 0.100     | 0.280 |
| $N^-$     | 0.152 | 0.395  | 0.230     | 0.670     | 0.150     | 0.400 |
| $Sm^+$    | 0.155 | 0.436  | 0.900     | 0.270     | 0.245     | 0.020 |
| $Sm^+$    | 0.160 | 0.442  | 0.934     | 0.280     | 0.260     | 0.030 |
| $Sm^+$    | 0.170 | 0.462  | 0.958     | 0.273     | 0.273     | 0.020 |
| $Sm^+$    | 0.200 | 0.498  | 0.975     | 0.255     | 0.255     | 0.010 |
| $Sm^+$    | 0.240 | 0.556  | 0.984     | 0.754     | 0.312     | 0.072 |
| $Sm^+$    | 0.250 | 0.566  | 0.984     | 0.340     | 0.340     | 0.118 |
| $Sm^+$    | 0.260 | 0.578  | 0.987     | 0.270     | 0.270     | 0.016 |
| $Col^-$   | 0.280 | 0.612  | 0.988     | 0.973     | 0.969     | 0.965 |
| $Col^-$   | 0.300 | 0.623  | 0.989     | 0.982     | 0.979     | 0.978 |
| $Col^-$   | 0.310 | 0.634  | 0.990     | 0.983     | 0.979     | 0.977 |
| $Col^-$   | 0.320 | 0.645  | 0.991     | 0.987     | 0.983     | 0.982 |
| $Col^-$   | 0.330 | 0.653  | 0.992     | 0.989     | 0.985     | 0.984 |
| $Col^-$   | 0.350 | 0.667  | 0.992     | 0.992     | 0.988     | 0.989 |
| $Col^-$   | 0.360 | 0.672  | 0.993     | 0.992     | 0.988     | 0.989 |
| $Col^-/K$ | 0.370 | 0.680  | 0.994     | 0.993     | 0.989     | 0.990 |
| K         | 0.380 | 0.686  | 0.994     | 0.994     | 0.990     | 0.991 |
| K         | 0.390 | 0.690  | 0.994     | 0.996     | 0.990     | 0.991 |
| K         | 0.400 | 0.695  | 0.994     | 0.994     | 0.990     | 0.992 |
| K         | 0.45  | 0.717  | 0.995     | 0.992     | 0.993     | 0.993 |

**Table 5. Reduced pressure, packing fraction, uniaxial and biaxial order parameters of HBPs with  $L^*=9$  and  $W^*=4$ . Absolute errors are lower than  $5 \cdot 10^{-3}$**

| Phase     | $P^*$ | $\eta$ | $S_{2,L}$ | $S_{2,T}$ | $S_{2,W}$ | $B_2$ |
|-----------|-------|--------|-----------|-----------|-----------|-------|
| I         | 0.100 | 0.322  | 0.050     | 0.050     | 0.050     | 0.000 |
| $N^-$     | 0.120 | 0.372  | 0.250     | 0.820     | 0.210     | 0.550 |
| $N^-$     | 0.130 | 0.394  | 0.260     | 0.900     | 0.250     | 0.630 |
| $Sm^+$    | 0.140 | 0.442  | 0.840     | 0.280     | 0.220     | 0.040 |
| $Sm^+$    | 0.160 | 0.479  | 0.955     | 0.254     | 0.254     | 0.001 |
| $Sm^+$    | 0.170 | 0.495  | 0.953     | 0.270     | 0.260     | 0.030 |
| $Sm^+$    | 0.190 | 0.530  | 0.963     | 0.270     | 0.268     | 0.030 |
| $Sm^+$    | 0.200 | 0.545  | 0.974     | 0.367     | 0.367     | 0.167 |
| $Sm^+$    | 0.210 | 0.558  | 0.966     | 0.287     | 0.261     | 0.048 |
| $Sm_B$    | 0.220 | 0.570  | 0.978     | 0.630     | 0.630     | 0.490 |
| $Col^-$   | 0.230 | 0.593  | 0.980     | 0.790     | 0.780     | 0.716 |
| $Col^-$   | 0.250 | 0.616  | 0.985     | 0.984     | 0.976     | 0.977 |
| $Col^-$   | 0.260 | 0.626  | 0.988     | 0.982     | 0.975     | 0.974 |
| $Col^-$   | 0.270 | 0.635  | 0.990     | 0.980     | 0.975     | 0.973 |
| $Col^-$   | 0.275 | 0.639  | 0.990     | 0.979     | 0.975     | 0.974 |
| $Col^-$   | 0.280 | 0.643  | 0.988     | 0.981     | 0.974     | 0.974 |
| $Col^-/K$ | 0.290 | 0.655  | 0.992     | 0.985     | 0.979     | 0.978 |
| $Col^-$   | 0.305 | 0.665  | 0.992     | 0.986     | 0.981     | 0.979 |
| K         | 0.350 | 0.696  | 0.993     | 0.995     | 0.990     | 0.992 |
| K         | 0.400 | 0.722  | 0.995     | 0.996     | 0.996     | 0.994 |
| K         | 0.600 | 0.793  | 0.997     | 0.998     | 0.996     | 0.997 |

**Table 6. Reduced pressure, packing fraction, uniaxial and biaxial order parameters of HBPs with  $L^*=9$  and  $W^*=4.5$ . Absolute errors are lower than  $5 \cdot 10^{-3}$**

| Phase   | $P^*$ | $\eta$ | $S_{2,L}$ | $S_{2,T}$ | $S_{2,W}$ | $B_2$ |
|---------|-------|--------|-----------|-----------|-----------|-------|
| I       | 0.030 | 0.201  | 0.020     | 0.020     | 0.010     | 0.020 |
| I       | 0.050 | 0.251  | 0.040     | 0.042     | 0.033     | 0.013 |
| I       | 0.075 | 0.300  | 0.030     | 0.050     | 0.050     | 0.050 |
| I       | 0.090 | 0.328  | 0.050     | 0.050     | 0.050     | 0.020 |
| $N^-$   | 0.100 | 0.362  | 0.240     | 0.850     | 0.230     | 0.010 |
| $N^-$   | 0.110 | 0.385  | 0.251     | 0.910     | 0.241     | 0.025 |
| $N^-$   | 0.120 | 0.406  | 0.254     | 0.941     | 0.254     | 0.018 |
| $N^-$   | 0.125 | 0.416  | 0.261     | 0.948     | 0.261     | 0.017 |
| $Sm^+$  | 0.130 | 0.455  | 0.863     | 0.290     | 0.217     | 0.030 |
| $Sm^+$  | 0.140 | 0.477  | 0.872     | 0.329     | 0.254     | 0.076 |
| $Sm^+$  | 0.150 | 0.498  | 0.903     | 0.290     | 0.250     | 0.065 |
| $Sm^+$  | 0.160 | 0.518  | 0.954     | 0.363     | 0.350     | 0.100 |
| $Sm^+$  | 0.170 | 0.534  | 0.894     | 0.452     | 0.363     | 0.125 |
| $Sm_B$  | 0.180 | 0.551  | 0.819     | 0.727     | 0.561     | 0.561 |
| $Sm_B$  | 0.190 | 0.573  | 0.829     | 0.910     | 0.753     | 0.753 |
| $Col^-$ | 0.200 | 0.591  | 0.977     | 0.984     | 0.969     | 0.975 |
| $Col^-$ | 0.210 | 0.602  | 0.985     | 0.975     | 0.985     | 0.977 |
| $Col^-$ | 0.220 | 0.615  | 0.982     | 0.987     | 0.975     | 0.977 |
| $Col^-$ | 0.230 | 0.624  | 0.985     | 0.987     | 0.979     | 0.982 |
| $Col^-$ | 0.240 | 0.634  | 0.988     | 0.989     | 0.982     | 0.984 |
| $Col^-$ | 0.250 | 0.642  | 0.989     | 0.988     | 0.983     | 0.983 |
| $Col^-$ | 0.280 | 0.669  | 0.991     | 0.991     | 0.987     | 0.988 |
| K       | 0.320 | 0.700  | 0.993     | 0.996     | 0.991     | 0.991 |
| K       | 0.350 | 0.717  | 0.994     | 0.996     | 0.992     | 0.994 |
| K       | 0.400 | 0.743  | 0.995     | 0.994     | 0.995     | 0.994 |

**Table 7. Reduced pressure, packing fraction, uniaxial and biaxial order parameters of HBPs with  $L^*=9$  and  $W^*=5$ . Absolute errors are lower than  $5 \cdot 10^{-3}$**

| Phase            | $P^*$ | $\eta$ | $S_{2,L}$ | $S_{2,T}$ | $S_{2,W}$ | $B_2$ |
|------------------|-------|--------|-----------|-----------|-----------|-------|
| I                | 0.060 | 0.285  | 0.020     | 0.020     | 0.020     | 0.020 |
| I                | 0.070 | 0.307  | 0.050     | 0.060     | 0.030     | 0.005 |
| I                | 0.075 | 0.318  | 0.050     | 0.100     | 0.040     | 0.010 |
| N-               | 0.080 | 0.343  | 0.220     | 0.810     | 0.210     | 0.002 |
| N-               | 0.120 | 0.432  | 0.267     | 0.955     | 0.257     | 0.023 |
| Sm <sup>-</sup>  | 0.130 | 0.456  | 0.272     | 0.974     | 0.270     | 0.028 |
| Sm <sup>-</sup>  | 0.140 | 0.484  | 0.267     | 0.977     | 0.260     | 0.019 |
| Sm <sup>-</sup>  | 0.150 | 0.520  | 0.329     | 0.925     | 0.266     | 0.094 |
| Sm <sup>-</sup>  | 0.160 | 0.543  | 0.379     | 0.927     | 0.302     | 0.142 |
| Col <sup>-</sup> | 0.170 | 0.570  | 0.905     | 0.952     | 0.867     | 0.862 |
| Col <sup>-</sup> | 0.180 | 0.590  | 0.972     | 0.985     | 0.966     | 0.963 |
| Col <sup>-</sup> | 0.190 | 0.602  | 0.979     | 0.982     | 0.966     | 0.969 |
| Col <sup>-</sup> | 0.200 | 0.618  | 0.984     | 0.987     | 0.978     | 0.978 |
| Col <sup>-</sup> | 0.220 | 0.639  | 0.987     | 0.990     | 0.983     | 0.983 |
| Col <sup>-</sup> | 0.225 | 0.643  | 0.988     | 0.990     | 0.984     | 0.984 |
| Col <sup>-</sup> | 0.255 | 0.671  | 0.989     | 0.995     | 0.987     | 0.985 |
| K                | 0.300 | 0.709  | 0.993     | 0.996     | 0.991     | 0.994 |
| K                | 0.400 | 0.761  | 0.996     | 0.998     | 0.995     | 0.997 |

**Table 8. Reduced pressure, packing fraction, uniaxial and biaxial order parameters of HBPs with  $L^*=9$  and  $W^*=5.5$ . Absolute errors are lower than  $5 \cdot 10^{-3}$**

| Phase   | $P^*$ | $\eta$ | $S_{2,L}$ | $S_{2,T}$ | $S_{2,W}$ | $B_2$ |
|---------|-------|--------|-----------|-----------|-----------|-------|
| I       | 0.030 | 0.217  | 0.001     | 0.001     | 0.001     | 0.001 |
| I       | 0.050 | 0.275  | 0.050     | 0.078     | 0.048     | 0.030 |
| I       | 0.060 | 0.300  | 0.020     | 0.020     | 0.020     | 0.020 |
| I       | 0.065 | 0.313  | 0.050     | 0.100     | 0.040     | 0.010 |
| $N^-$   | 0.070 | 0.336  | 0.210     | 0.800     | 0.210     | 0.010 |
| $N^-$   | 0.080 | 0.365  | 0.240     | 0.900     | 0.240     | 0.001 |
| $N^-$   | 0.100 | 0.414  | 0.270     | 0.960     | 0.270     | 0.020 |
| $N^-$   | 0.110 | 0.435  | 0.265     | 0.962     | 0.260     | 0.030 |
| $Sm^-$  | 0.120 | 0.460  | 0.265     | 0.977     | 0.265     | 0.021 |
| $Sm^-$  | 0.130 | 0.493  | 0.268     | 0.990     | 0.265     | 0.020 |
| $Sm^-$  | 0.140 | 0.524  | 0.270     | 0.988     | 0.262     | 0.023 |
| $Sm^-$  | 0.150 | 0.548  | 0.267     | 0.992     | 0.267     | 0.020 |
| $Col^-$ | 0.155 | 0.573  | 0.958     | 0.982     | 0.949     | 0.941 |
| $Col^-$ | 0.160 | 0.584  | 0.974     | 0.983     | 0.967     | 0.965 |
| $Col^-$ | 0.180 | 0.613  | 0.981     | 0.987     | 0.976     | 0.976 |
| $Col^-$ | 0.200 | 0.640  | 0.987     | 0.990     | 0.984     | 0.984 |
| $Col^-$ | 0.230 | 0.673  | 0.990     | 0.994     | 0.988     | 0.987 |
| $Col^-$ | 0.250 | 0.690  | 0.992     | 0.996     | 0.990     | 0.989 |
| K       | 0.280 | 0.714  | 0.993     | 0.997     | 0.992     | 0.995 |
| K       | 0.300 | 0.725  | 0.994     | 0.997     | 0.993     | 0.995 |



**Table 9. Reduced pressure, packing fraction, uniaxial and biaxial order parameters of HBPs with  $L^*=9$  and  $W^*=7$ . Absolute errors are lower than  $5 \cdot 10^{-3}$**

| Phase  | $P^*$ | $\eta$ | $S_{2,L}$ | $S_{2,T}$ | $S_{2,W}$ | $B_2$ |
|--------|-------|--------|-----------|-----------|-----------|-------|
| I      | 0.020 | 0.199  | 0.001     | 0.000     | 0.001     | 0.001 |
| I      | 0.030 | 0.242  | 0.025     | 0.040     | 0.025     | 0.010 |
| I      | 0.035 | 0.263  | 0.040     | 0.070     | 0.038     | 0.010 |
| I      | 0.038 | 0.274  | 0.040     | 0.060     | 0.040     | 0.010 |
| I      | 0.041 | 0.285  | 0.040     | 0.100     | 0.040     | 0.002 |
| $N^-$  | 0.050 | 0.330  | 0.210     | 0.880     | 0.210     | 0.000 |
| $N^-$  | 0.080 | 0.425  | 0.262     | 0.965     | 0.257     | 0.010 |
| $N^-$  | 0.090 | 0.452  | 0.260     | 0.980     | 0.270     | 0.010 |
| $Sm^-$ | 0.100 | 0.496  | 0.269     | 0.983     | 0.263     | 0.027 |
| $Sm^-$ | 0.110 | 0.524  | 0.258     | 0.988     | 0.258     | 0.019 |
| $Sm^-$ | 0.120 | 0.551  | 0.276     | 0.992     | 0.276     | 0.040 |
| Col    | 0.135 | 0.598  | 0.951     | 0.989     | 0.949     | 0.936 |
| Col    | 0.150 | 0.632  | 0.984     | 0.993     | 0.982     | 0.980 |
| Col    | 0.170 | 0.657  | 0.987     | 0.993     | 0.985     | 0.983 |
| Col    | 0.180 | 0.670  | 0.989     | 0.995     | 0.989     | 0.986 |
| K      | 0.200 | 0.695  | 0.991     | 0.996     | 0.991     | 0.989 |
| K      | 0.210 | 0.705  | 0.992     | 0.997     | 0.997     | 0.989 |

**Table 10.** Reduced pressure, packing fraction, uniaxial and biaxial order parameters of HBPs with  $L^*=9$  and  $W^*=8$ . Absolute errors are lower than  $5 \cdot 10^{-3}$

| Phase | $P^*$ | $\eta$ | $S_{2,L}$ | $S_{2,T}$ | $S_{2,W}$ | $B_2$ |
|-------|-------|--------|-----------|-----------|-----------|-------|
| I     | 0.020 | 0.212  | 0.050     | 0.050     | 0.050     | 0.000 |
| I     | 0.025 | 0.237  | 0.030     | 0.020     | 0.030     | 0.020 |
| I     | 0.030 | 0.262  | 0.035     | 0.050     | 0.030     | 0.010 |
| N-    | 0.035 | 0.295  | 0.210     | 0.750     | 0.210     | 0.020 |
| N-    | 0.050 | 0.358  | 0.280     | 0.920     | 0.280     | 0.050 |
| N-    | 0.060 | 0.392  | 0.250     | 0.950     | 0.250     | 0.010 |
| N-    | 0.075 | 0.442  | 0.272     | 0.975     | 0.272     | 0.040 |
| Col   | 0.080 | 0.486  | 0.255     | 0.980     | 0.255     | 0.020 |
| Col   | 0.085 | 0.507  | 0.290     | 0.980     | 0.290     | 0.050 |
| Col   | 0.090 | 0.522  | 0.269     | 0.985     | 0.269     | 0.028 |
| Col   | 0.100 | 0.553  | 0.560     | 0.987     | 0.560     | 0.418 |
| Col   | 0.110 | 0.574  | 0.560     | 0.990     | 0.560     | 0.420 |
| Col   | 0.120 | 0.597  | 0.560     | 0.990     | 0.560     | 0.420 |
| Col   | 0.125 | 0.607  | 0.560     | 0.990     | 0.560     | 0.430 |
| Col   | 0.130 | 0.616  | 0.560     | 0.990     | 0.560     | 0.430 |
| Col   | 0.150 | 0.662  | 0.988     | 0.996     | 0.987     | 0.985 |
| K     | 0.170 | 0.689  | 0.991     | 0.998     | 0.990     | 0.987 |
| K     | 0.190 | 0.710  | 0.992     | 0.998     | 0.992     | 0.990 |
| K     | 0.210 | 0.731  | 0.993     | 0.998     | 0.993     | 0.991 |

**Table 11.** Reduced pressure, packing fraction, uniaxial and biaxial order parameters of HBPs with  $L^*=9$  and  $W^*=9$ . Absolute errors are lower than  $5 \cdot 10^{-3}$

| Phase | $P^*$ | $\eta$ | $S_{2,L}$ | $S_{2,T}$ | $S_{2,W}$ | $B_2$ |
|-------|-------|--------|-----------|-----------|-----------|-------|
| I     | 0.010 | 0.170  | 0.000     | 0.000     | 0.000     | 0.000 |
| I     | 0.015 | 0.193  | 0.025     | 0.040     | 0.025     | 0.020 |
| I     | 0.020 | 0.224  | 0.050     | 0.040     | 0.030     | 0.000 |
| I     | 0.025 | 0.254  | 0.050     | 0.100     | 0.050     | 0.010 |
| $N^-$ | 0.027 | 0.272  | 0.198     | 0.710     | 0.190     | 0.001 |
| $N^-$ | 0.028 | 0.280  | 0.200     | 0.750     | 0.200     | 0.001 |
| $N^-$ | 0.030 | 0.292  | 0.210     | 0.820     | 0.210     | 0.000 |
| $N^-$ | 0.040 | 0.340  | 0.240     | 0.930     | 0.240     | 0.020 |
| $N^-$ | 0.050 | 0.382  | 0.250     | 0.950     | 0.250     | 0.010 |
| $N^-$ | 0.060 | 0.420  | 0.250     | 0.975     | 0.250     | 0.001 |
| $N^-$ | 0.065 | 0.445  | 0.254     | 0.973     | 0.250     | 0.001 |
| $N^-$ | 0.070 | 0.466  | 0.254     | 0.982     | 0.254     | 0.001 |
| $N^-$ | 0.072 | 0.473  | 0.255     | 0.981     | 0.255     | 0.010 |
| $N^-$ | 0.073 | 0.478  | 0.250     | 0.983     | 0.248     | 0.005 |
| $N^-$ | 0.074 | 0.481  | 0.256     | 0.982     | 0.256     | 0.012 |
| Col   | 0.075 | 0.515  | 0.650     | 0.978     | 0.650     | 0.540 |
| Col   | 0.085 | 0.550  | 0.648     | 0.970     | 0.648     | 0.540 |
| Col   | 0.110 | 0.600  | 0.700     | 0.990     | 0.700     | 0.600 |
| Col   | 0.115 | 0.611  | 0.692     | 0.995     | 0.692     | 0.588 |
| Col   | 0.120 | 0.633  | 0.983     | 0.993     | 0.984     | 0.980 |
| Col   | 0.125 | 0.645  | 0.987     | 0.994     | 0.986     | 0.983 |
| Col   | 0.130 | 0.653  | 0.987     | 0.994     | 0.987     | 0.984 |
| K     | 0.150 | 0.687  | 0.990     | 0.998     | 0.990     | 0.987 |
| K     | 0.170 | 0.712  | 0.992     | 0.998     | 0.992     | 0.990 |

**Table 12. Reduced pressure, packing fraction, uniaxial and biaxial order parameters of HBPs with  $L^*=12$  and  $W^*=1$ . Absolute errors are lower than  $5 \cdot 10^{-3}$**

| Phase   | $P^*$ | $\eta$ | $S_{2,L}$ | $S_{2,T}$ | $S_{2,W}$ | $B_2$ |
|---------|-------|--------|-----------|-----------|-----------|-------|
| I       | 0.100 | 0.179  | 0.036     | 0.022     | 0.027     | -     |
| I       | 0.130 | 0.203  | 0.048     | 0.023     | 0.024     | -     |
| $N^+$   | 0.140 | 0.235  | 0.758     | 0.202     | 0.202     | 0.014 |
| $N^+$   | 0.150 | 0.246  | 0.794     | 0.212     | 0.212     | 0.014 |
| $N^+$   | 0.200 | 0.290  | 0.918     | 0.244     | 0.244     | 0.015 |
| $N^+$   | 0.300 | 0.366  | 0.976     | 0.261     | 0.261     | 0.018 |
| $N^+$   | 0.350 | 0.402  | 0.986     | 0.262     | 0.262     | 0.017 |
| $Sm^+$  | 0.370 | 0.413  | 0.988     | 0.263     | 0.263     | 0.018 |
| $Sm^+$  | 0.400 | 0.434  | 0.990     | 0.265     | 0.265     | 0.014 |
| $Sm^+$  | 0.500 | 0.489  | 0.994     | 0.259     | 0.259     | 0.013 |
| $Sm^+$  | 0.530 | 0.533  | 0.997     | 0.260     | 0.260     | 0.016 |
| $Col^+$ | 0.550 | 0.555  | 0.998     | 0.266     | 0.266     | 0.024 |
| $Col^+$ | 0.600 | 0.578  | 0.998     | 0.275     | 0.275     | 0.032 |
| $Col^+$ | 0.750 | 0.630  | 0.999     | 0.968     | 0.968     | 0.957 |
| $Col^+$ | 1.000 | 0.692  | 0.999     | 0.989     | 0.898     | 0.986 |
| $Col^+$ | 1.400 | 0.759  | 0.999     | 0.995     | 0.995     | 0.993 |
| K       | 1.500 | 0.772  | 0.999     | 0.994     | 0.994     | 0.994 |
| K       | 2.000 | 0.826  | 0.999     | 0.997     | 0.997     | 0.996 |

**Table 13.** Reduced pressure, packing fraction, uniaxial and biaxial order parameters of HBPs with  $L^*=12$  and  $W^*=2.5$ . Absolute errors are lower than  $5 \cdot 10^{-3}$

| Phase   | $P^*$ | $\eta$ | $S_{2,L}$ | $S_{2,T}$ | $S_{2,W}$ | $B_2$ |
|---------|-------|--------|-----------|-----------|-----------|-------|
| I       | 0.070 | 0.243  | 0.022     | 0.022     | 0.014     | 0.001 |
| I       | 0.080 | 0.260  | 0.085     | 0.019     | 0.007     | 0.002 |
| I       | 0.090 | 0.277  | 0.154     | 0.079     | 0.039     | 0.011 |
| $N^+$   | 0.095 | 0.294  | 0.586     | 0.139     | 0.135     | 0.001 |
| $N^+$   | 0.100 | 0.308  | 0.755     | 0.231     | 0.183     | 0.001 |
| $N^+$   | 0.120 | 0.349  | 0.907     | 0.251     | 0.235     | 0.010 |
| $N^+$   | 0.130 | 0.370  | 0.932     | 0.250     | 0.241     | 0.009 |
| $Sm^+$  | 0.140 | 0.400  | 0.966     | 0.256     | 0.251     | 0.011 |
| $Sm^+$  | 0.150 | 0.416  | 0.971     | 0.256     | 0.255     | 0.012 |
| $Sm^+$  | 0.200 | 0.486  | 0.987     | 0.267     | 0.264     | 0.010 |
| $Sm^+$  | 0.230 | 0.523  | 0.990     | 0.257     | 0.256     | 0.005 |
| $Sm^+$  | 0.250 | 0.548  | 0.991     | 0.257     | 0.257     | 0.019 |
| $Col^+$ | 0.255 | 0.588  | 0.995     | 0.974     | 0.972     | 0.978 |
| $Col^+$ | 0.270 | 0.605  | 0.996     | 0.985     | 0.983     | 0.980 |
| $Col^+$ | 0.300 | 0.629  | 0.997     | 0.989     | 0.988     | 0.985 |
| $Col^+$ | 0.400 | 0.693  | 0.998     | 0.994     | 0.991     | 0.988 |
| $Col^+$ | 0.500 | 0.735  | 0.999     | 0.996     | 0.995     | 0.991 |
| K       | 0.600 | 0.768  | 0.999     | 0.997     | 0.996     | 0.993 |

**Table 14.** Reduced pressure, packing fraction, uniaxial and biaxial order parameters of HBPs with  $L^*=12$  and  $W^*=3$ . Absolute errors are lower than  $5 \cdot 10^{-3}$

| Phase   | $P^*$ | $\eta$ | $S_{2,L}$ | $S_{2,T}$ | $S_{2,W}$ | $B_2$ |
|---------|-------|--------|-----------|-----------|-----------|-------|
| I       | 0.070 | 0.266  | 0.0409    | 0.037     | 0.0187    | 0.001 |
| I       | 0.080 | 0.285  | 0.098     | 0.044     | 0.0091    | 0.020 |
| I       | 0.082 | 0.289  | 0.022     | 0.012     | 0.034     | 0.010 |
| $N^+$   | 0.085 | 0.308  | 0.680     | 0.237     | 0.161     | 0.004 |
| $N^+$   | 0.090 | 0.314  | 0.699     | 0.247     | 0.172     | 0.003 |
| $N^+$   | 0.095 | 0.327  | 0.782     | 0.240     | 0.195     | 0.007 |
| $N^+$   | 0.100 | 0.348  | 0.861     | 0.248     | 0.218     | 0.009 |
| $N^+$   | 0.105 | 0.360  | 0.911     | 0.250     | 0.231     | 0.010 |
| $Sm^+$  | 0.110 | 0.389  | 0.954     | 0.259     | 0.250     | 0.012 |
| $Sm^+$  | 0.150 | 0.466  | 0.980     | 0.264     | 0.261     | 0.015 |
| $Sm^+$  | 0.200 | 0.537  | 0.989     | 0.276     | 0.274     | 0.019 |
| $Sm^+$  | 0.220 | 0.557  | 0.975     | 0.283     | 0.274     | 0.045 |
| $Col^+$ | 0.230 | 0.607  | 0.995     | 0.989     | 0.984     | 0.985 |
| $Col^+$ | 0.250 | 0.629  | 0.996     | 0.991     | 0.986     | 0.988 |
| $Col^+$ | 0.300 | 0.666  | 0.997     | 0.994     | 0.992     | 0.991 |
| $Col^+$ | 0.400 | 0.725  | 0.998     | 0.997     | 0.995     | 0.997 |
| $Col^+$ | 0.430 | 0.741  | 0.998     | 0.997     | 0.996     | 0.991 |
| $Col^+$ | 0.450 | 0.746  | 0.998     | 0.997     | 0.996     | 0.992 |
| K       | 0.500 | 0.775  | 0.999     | 0.998     | 0.997     | 0.993 |

**Table 15. Reduced pressure, packing fraction, uniaxial and biaxial order parameters of HBPs with  $L^*=12$  and  $W^*=3.46$ . Absolute errors are lower than  $5 \cdot 10^{-3}$**

| Phase   | $P^*$ | $\eta$ | $S_{2,L}$ | $S_{2,T}$ | $S_{2,W}$ | $B_2$ |
|---------|-------|--------|-----------|-----------|-----------|-------|
| I       | 0.070 | 0.285  | 0.021     | 0.017     | 0.03      | 0.001 |
| I       | 0.080 | 0.306  | 0.084     | 0.102     | 0.021     | 0.006 |
| I       | 0.082 | 0.313  | 0.214     | 0.276     | 0.041     | 0.010 |
| $N^+$   | 0.083 | 0.319  | 0.508     | 0.283     | 0.123     | 0.068 |
| $N^+$   | 0.084 | 0.327  | 0.669     | 0.298     | 0.182     | 0.048 |
| $N^+$   | 0.085 | 0.330  | 0.677     | 0.268     | 0.169     | 0.060 |
| $N^+$   | 0.090 | 0.354  | 0.864     | 0.284     | 0.242     | 0.051 |
| $Sm^+$  | 0.095 | 0.381  | 0.922     | 0.263     | 0.247     | 0.027 |
| $Sm^+$  | 0.100 | 0.394  | 0.951     | 0.264     | 0.255     | 0.011 |
| $Sm^+$  | 0.120 | 0.442  | 0.969     | 0.269     | 0.263     | 0.016 |
| $Sm^+$  | 0.150 | 0.499  | 0.983     | 0.266     | 0.263     | 0.011 |
| $Sm^+$  | 0.170 | 0.534  | 0.987     | 0.270     | 0.268     | 0.023 |
| $Col^+$ | 0.190 | 0.594  | 0.993     | 0.984     | 0.979     | 0.977 |
| $Col^+$ | 0.200 | 0.609  | 0.994     | 0.991     | 0.987     | 0.987 |
| $Col^+$ | 0.300 | 0.697  | 0.997     | 0.996     | 0.994     | 0.994 |
| $Col^+$ | 0.400 | 0.752  | 0.998     | 0.998     | 0.997     | 0.997 |
| $Col^+$ | 0.450 | 0.772  | 0.999     | 0.998     | 0.997     | 0.996 |
| K       | 0.500 | 0.788  | 0.999     | 0.998     | 0.997     | 0.996 |

**Table 16. Reduced pressure, packing fraction, uniaxial and biaxial order parameters of HBPs with  $L^*=12$  and  $W^*=3.6$ . Absolute errors are lower than  $5 \cdot 10^{-3}$**

| Phase   | $P^*$ | $\eta$ | $S_{2,L}$ | $S_{2,T}$ | $S_{2,W}$ | $B_2$ |
|---------|-------|--------|-----------|-----------|-----------|-------|
| I       | 0.060 | 0.270  | 0.020     | 0.01      | 0.018     | 0.007 |
| I       | 0.070 | 0.291  | 0.083     | 0.104     | 0.028     | 0.012 |
| I       | 0.075 | 0.304  | 0.20      | 0.131     | 0.025     | 0.013 |
| $N^+$   | 0.080 | 0.321  | 0.212     | 0.571     | 0.113     | 0.01  |
| $N^+$   | 0.085 | 0.336  | 0.244     | 0.801     | 0.187     | 0.013 |
| $N^+$   | 0.088 | 0.344  | 0.266     | 0.774     | 0.196     | 0.012 |
| $Sm^+$  | 0.089 | 0.363  | 0.850     | 0.257     | 0.224     | 0.015 |
| $Sm^+$  | 0.090 | 0.374  | 0.894     | 0.253     | 0.237     | 0.018 |
| $Sm^+$  | 0.100 | 0.408  | 0.960     | 0.261     | 0.254     | 0.011 |
| $Sm^+$  | 0.150 | 0.508  | 0.985     | 0.276     | 0.273     | 0.017 |
| $Sm^+$  | 0.160 | 0.533  | 0.987     | 0.281     | 0.278     | 0.033 |
| $Col^-$ | 0.170 | 0.560  | 0.988     | 0.911     | 0.909     | 0.878 |
| $Col^-$ | 0.200 | 0.603  | 0.991     | 0.980     | 0.978     | 0.973 |
| $Col^+$ | 0.210 | 0.627  | 0.995     | 0.992     | 0.989     | 0.989 |
| $Col^+$ | 0.250 | 0.670  | 0.997     | 0.995     | 0.993     | 0.993 |
| $Col^+$ | 0.300 | 0.703  | 0.997     | 0.997     | 0.995     | 0.995 |
| $Col^+$ | 0.400 | 0.761  | 0.998     | 0.998     | 0.997     | 0.997 |
| $Col^+$ | 0.450 | 0.777  | 0.999     | 0.997     | 0.997     | 0.997 |
| K       | 0.500 | 0.795  | 0.999     | 0.998     | 0.998     | 0.997 |



**Table 17. Reduced pressure, packing fraction, uniaxial and biaxial order parameters of HBPs with  $L^*=12$  and  $W^*=3.8$ . Absolute errors are lower than  $5 \cdot 10^{-3}$**

| Phase   | $P^*$ | $\eta$ | $S_{2,L}$ | $S_{2,T}$ | $S_{2,W}$ | $B_2$  |
|---------|-------|--------|-----------|-----------|-----------|--------|
| I       | 0.040 | 0.227  | 0.030     | 0.033     | 0.017     | 0.010  |
| I       | 0.060 | 0.279  | 0.093     | 0.092     | 0.0335    | 0.011  |
| I       | 0.066 | 0.293  | 0.129     | 0.027     | 0.32      | 0.011  |
| $N^-$   | 0.067 | 0.297  | 0.200     | 0.499     | 0.103     | 0.0165 |
| $N^-$   | 0.068 | 0.304  | 0.214     | 0.583     | 0.137     | 0.019  |
| $N^-$   | 0.070 | 0.310  | 0.249     | 0.692     | 0.174     | 0.037  |
| $N^-$   | 0.080 | 0.337  | 0.272     | 0.790     | 0.205     | 0.050  |
| $N^-$   | 0.085 | 0.355  | 0.264     | 0.861     | 0.234     | 0.013  |
| $Sm^+$  | 0.086 | 0.372  | 0.883     | 0.256     | 0.240     | 0.014  |
| $Sm^+$  | 0.087 | 0.375  | 0.881     | 0.263     | 0.234     | 0.033  |
| $Sm^+$  | 0.088 | 0.379  | 0.902     | 0.266     | 0.246     | 0.028  |
| $Sm^+$  | 0.090 | 0.396  | 0.949     | 0.268     | 0.257     | 0.019  |
| $Sm^+$  | 0.100 | 0.423  | 0.964     | 0.273     | 0.266     | 0.023  |
| $Sm^+$  | 0.150 | 0.531  | 0.986     | 0.264     | 0.261     | 0.012  |
| $Col^-$ | 0.160 | 0.561  | 0.950     | 0.939     | 0.973     | 0.934  |
| $Col^-$ | 0.180 | 0.598  | 0.991     | 0.978     | 0.974     | 0.971  |
| $Col^-$ | 0.190 | 0.606  | 0.990     | 0.979     | 0.977     | 0.973  |
| $Col^-$ | 0.200 | 0.625  | 0.993     | 0.988     | 0.984     | 0.982  |
| $Col^+$ | 0.230 | 0.662  | 0.996     | 0.995     | 0.992     | 0.994  |
| $Col^+$ | 0.300 | 0.717  | 0.997     | 0.997     | 0.995     | 0.996  |
| $Col^+$ | 0.400 | 0.767  | 0.998     | 0.998     | 0.997     | 0.997  |
| $Col^+$ | 0.450 | 0.789  | 0.999     | 0.999     | 0.999     | 0.998  |
| K       | 0.470 | 0.793  | 0.999     | 0.999     | 0.998     | 0.998  |
| K       | 0.500 | 0.803  | 0.999     | 0.999     | 0.999     | 0.998  |

**Table 18. Reduced pressure, packing fraction, uniaxial and biaxial order parameters of HBPs with  $L^*=12$  and  $W^*=4$ . Absolute errors are lower than  $5 \cdot 10^{-3}$**

| Phase   | $P^*$ | $\eta$ | $S_{2,L}$ | $S_{2,T}$ | $S_{2,W}$ | $B_2$ |
|---------|-------|--------|-----------|-----------|-----------|-------|
| I       | 0.050 | 0.261  | 0.028     | 0.037     | 0.020     | 0.001 |
| I       | 0.060 | 0.287  | 0.092     | 0.123     | 0.030     | 0.002 |
| $N^-$   | 0.061 | 0.293  | 0.204     | 0.564     | 0.125     | 0.021 |
| $N^-$   | 0.065 | 0.309  | 0.174     | 0.506     | 0.031     | 0.031 |
| $N^-$   | 0.070 | 0.319  | 0.245     | 0.745     | 0.181     | 0.027 |
| $N^-$   | 0.080 | 0.348  | 0.254     | 0.853     | 0.220     | 0.022 |
| $N^-$   | 0.084 | 0.363  | 0.263     | 0.898     | 0.239     | 0.019 |
| $Sm^+$  | 0.085 | 0.391  | 0.927     | 0.268     | 0.251     | 0.025 |
| $Sm^+$  | 0.090 | 0.412  | 0.959     | 0.276     | 0.266     | 0.041 |
| $Sm^+$  | 0.100 | 0.436  | 0.9655    | 0.268     | 0.018     | 0.020 |
| $Sm^+$  | 0.120 | 0.481  | 0.979     | 0.271     | 0.017     | 0.016 |
| $Sm^+$  | 0.130 | 0.503  | 0.981     | 0.282     | 0.278     | 0.025 |
| $Sm^+$  | 0.140 | 0.527  | 0.984     | 0.283     | 0.280     | 0.034 |
| $Col^-$ | 0.150 | 0.560  | 0.987     | 0.949     | 0.940     | 0.936 |
| $Col^-$ | 0.175 | 0.600  | 0.991     | 0.982     | 0.977     | 0.976 |
| K       | 0.185 | 0.617  | 0.992     | 0.990     | 0.985     | 0.986 |
| K       | 0.200 | 0.641  | 0.993     | 0.993     | 0.988     | 0.990 |

**Table 19. Reduced pressure, packing fraction, uniaxial and biaxial order parameters of HBPs with  $L^*=12$  and  $W^*=4.5$ . Absolute errors are lower than  $5 \cdot 10^{-3}$**

| Phase   | $P^*$ | $\eta$ | $S_{2,L}$ | $S_{2,T}$ | $S_{2,W}$ | $B_2$ |
|---------|-------|--------|-----------|-----------|-----------|-------|
| I       | 0.020 | 0.179  | 0.025     | 0.028     | 0.020     | 0.001 |
| I       | 0.030 | 0.217  | 0.032     | 0.047     | 0.022     | 0.010 |
| I       | 0.045 | 0.266  | 0.044     | 0.057     | 0.030     | 0.005 |
| $N^-$   | 0.050 | 0.287  | 0.204     | 0.656     | 0.160     | 0.012 |
| $N^-$   | 0.055 | 0.309  | 0.243     | 0.81      | 0.212     | 0.015 |
| $N^-$   | 0.060 | 0.321  | 0.234     | 0.823     | 0.208     | 0.019 |
| $N^-$   | 0.070 | 0.351  | 0.255     | 0.900     | 0.237     | 0.018 |
| $N^-$   | 0.074 | 0.365  | 0.256     | 0.935     | 0.244     | 0.012 |
| $Sm^+$  | 0.075 | 0.388  | 0.917     | 0.285     | 0.260     | 0.037 |
| $Sm^+$  | 0.080 | 0.408  | 0.938     | 0.289     | 0.268     | 0.041 |
| $Sm^+$  | 0.100 | 0.462  | 0.967     | 0.275     | 0.266     | 0.012 |
| $Sm^+$  | 0.110 | 0.493  | 0.976     | 0.277     | 0.272     | 0.021 |
| $Col^-$ | 0.120 | 0.530  | 0.981     | 0.964     | 0.952     | 0.934 |
| $Col^-$ | 0.140 | 0.572  | 0.986     | 0.973     | 0.965     | 0.977 |
| $Col^-$ | 0.150 | 0.59   | 0.988     | 0.974     | 0.973     | 0.973 |
| $Col^-$ | 0.160 | 0.609  | 0.991     | 0.986     | 0.981     | 0.986 |
| K       | 0.165 | 0.617  | 0.992     | 0.990     | 0.984     | 0.985 |
| K       | 0.200 | 0.665  | 0.994     | 0.996     | 0.991     | 0.993 |

**Table 20. Reduced pressure, packing fraction, uniaxial and biaxial order parameters of HBPs with  $L^*=12$  and  $W^*=5$ . Absolute errors are lower than  $5 \cdot 10^{-3}$**

| Phase   | $P^*$ | $\eta$ | $S_{2,L}$ | $S_{2,T}$ | $S_{2,W}$ | $B_2$ |
|---------|-------|--------|-----------|-----------|-----------|-------|
| I       | 0.030 | 0.229  | 0.055     | 0.064     | 0.024     | 0.001 |
| I       | 0.035 | 0.248  | 0.043     | 0.037     | 0.045     | 0.010 |
| $N^-$   | 0.040 | 0.269  | 0.185     | 0.559     | 0.140     | 0.020 |
| $N^-$   | 0.050 | 0.314  | 0.242     | 0.860     | 0.226     | 0.019 |
| $N^-$   | 0.060 | 0.347  | 0.257     | 0.921     | 0.249     | 0.024 |
| $N^-$   | 0.070 | 0.376  | 0.260     | 0.936     | 0.248     | 0.018 |
| $N^-$   | 0.080 | 0.405  | 0.265     | 0.929     | 0.239     | 0.021 |
| $Sm^+$  | 0.085 | 0.440  | 0.767     | 0.591     | 0.430     | 0.027 |
| $Sm^+$  | 0.090 | 0.464  | 0.891     | 0.567     | 0.487     | 0.034 |
| $Sm^+$  | 0.100 | 0.496  | 0.905     | 0.585     | 0.511     | 0.061 |
| $Col^-$ | 0.110 | 0.532  | 0.956     | 0.944     | 0.924     | 0.936 |
| $Col^-$ | 0.120 | 0.553  | 0.962     | 0.963     | 0.950     | 0.953 |
| $Col^-$ | 0.130 | 0.582  | 0.986     | 0.984     | 0.975     | 0.979 |
| $Col^-$ | 0.140 | 0.602  | 0.989     | 0.985     | 0.979     | 0.983 |
| K       | 0.150 | 0.626  | 0.992     | 0.994     | 0.988     | 0.988 |
| K       | 0.200 | 0.693  | 0.995     | 0.997     | 0.993     | 0.993 |

**Table 21. Reduced pressure, packing fraction, uniaxial and biaxial order parameters of HBPs with  $L^*=12$  and  $W^*=5.5$ . Absolute errors are lower than  $5 \cdot 10^{-3}$**

| Phase   | $P^*$ | $\eta$ | $S_{2,L}$ | $S_{2,T}$ | $S_{2,W}$ | $B_2$ |
|---------|-------|--------|-----------|-----------|-----------|-------|
| I       | 0.030 | 0.242  | 0.048     | 0.098     | 0.034     | 0.001 |
| I       | 0.035 | 0.271  | 0.203     | 0.682     | 0.175     | 0.002 |
| $N^-$   | 0.040 | 0.297  | 0.235     | 0.832     | 0.220     | 0.019 |
| $N^-$   | 0.050 | 0.333  | 0.251     | 0.910     | 0.243     | 0.018 |
| $N^-$   | 0.070 | 0.397  | 0.262     | 0.953     | 0.256     | 0.014 |
| $N^-$   | 0.075 | 0.412  | 0.260     | 0.965     | 0.256     | 0.019 |
| $N^-$   | 0.080 | 0.434  | 0.261     | 0.969     | 0.254     | 0.015 |
| $Sm^+$  | 0.083 | 0.466  | 0.543     | 0.466     | 0.149     | 0.04  |
| $Sm^+$  | 0.085 | 0.473  | 0.520     | 0.480     | 0.147     | 0.033 |
| $Sm^+$  | 0.088 | 0.474  | 0.507     | 0.473     | 0.139     | 0.067 |
| $Col^-$ | 0.090 | 0.500  | 0.873     | 0.57      | 0.845     | 0.825 |
| $Col^-$ | 0.100 | 0.538  | 0.969     | 0.980     | 0.956     | 0.956 |
| $Col^-$ | 0.130 | 0.606  | 0.987     | 0.989     | 0.980     | 0.981 |
| $Col^-$ | 0.14  | 0.624  | 0.990     | 0.990     | 0.984     | 0.986 |
| K       | 0.150 | 0.642  | 0.991     | 0.995     | 0.988     | 0.987 |

**Table 22. Reduced pressure, packing fraction, uniaxial and biaxial order parameters of HBPs with  $L^*=12$  and  $W^*=6$ . Absolute errors are lower than  $5 \cdot 10^{-3}$**

| Phase   | $P^*$ | $\eta$ | $S_{2,L}$ | $S_{2,T}$ | $S_{2,W}$ | $B_2$ |
|---------|-------|--------|-----------|-----------|-----------|-------|
| I       | 0.020 | 0.204  | 0.036     | 0.047     | 0.024     | 0.001 |
| I       | 0.025 | 0.230  | 0.039     | 0.066     | 0.032     | 0.002 |
| I       | 0.028 | 0.244  | 0.09      | 0.215     | 0.055     | 0.011 |
| $N^-$   | 0.029 | 0.253  | 0.155     | 0.462     | 0.123     | 0.017 |
| $N^-$   | 0.030 | 0.264  | 0.220     | 0.774     | 0.20      | 0.013 |
| $N^-$   | 0.040 | 0.313  | 0.238     | 0.872     | 0.231     | 0.018 |
| $N^-$   | 0.060 | 0.387  | 0.262     | 0.971     | 0.260     | 0.022 |
| $N^-$   | 0.070 | 0.421  | 0.268     | 0.971     | 0.259     | 0.013 |
| $N^-$   | 0.075 | 0.439  | 0.263     | 0.981     | 0.261     | 0.025 |
| $N^-$   | 0.080 | 0.458  | 0.286     | 0.984     | 0.283     | 0.047 |
| $N^-$   | 0.083 | 0.472  | 0.242     | 0.854     | 0.249     | 0.038 |
| $Col^-$ | 0.085 | 0.509  | 0.927     | 0.975     | 0.949     | 0.902 |
| $Col^-$ | 0.090 | 0.532  | 0.962     | 0.981     | 0.949     | 0.947 |
| $Col^-$ | 0.100 | 0.561  | 0.979     | 0.986     | 0.970     | 0.968 |
| $Col^-$ | 0.110 | 0.589  | 0.984     | 0.988     | 0.977     | 0.978 |
| K       | 0.120 | 0.609  | 0.988     | 0.992     | 0.983     | 0.983 |
| K       | 0.150 | 0.667  | 0.991     | 0.997     | 0.989     | 0.989 |

**Table 23.** Reduced pressure, packing fraction, uniaxial and biaxial order parameters of HBPs with  $L^*=12$  and  $W^*=7$ . Absolute errors are lower than  $5 \cdot 10^{-3}$

| Phase   | $P^*$ | $\eta$ | $S_{2,L}$ | $S_{2,T}$ | $S_{2,W}$ | $B_2$ |
|---------|-------|--------|-----------|-----------|-----------|-------|
| I       | 0.022 | 0.235  | 0.082     | 0.144     | 0.063     | 0.003 |
| $N^-$   | 0.023 | 0.245  | 0.192     | 0.642     | 0.172     | 0.017 |
| $N^-$   | 0.025 | 0.266  | 0.219     | 0.750     | 0.204     | 0.011 |
| $N^-$   | 0.030 | 0.295  | 0.237     | 0.847     | 0.228     | 0.022 |
| $N^-$   | 0.040 | 0.343  | 0.256     | 0.940     | 0.254     | 0.020 |
| $N^-$   | 0.060 | 0.421  | 0.266     | 0.981     | 0.265     | 0.024 |
| $N^-$   | 0.065 | 0.437  | 0.271     | 0.986     | 0.270     | 0.021 |
| $N^-$   | 0.068 | 0.450  | 0.273     | 0.987     | 0.273     | 0.030 |
| $Sm^-$  | 0.070 | 0.465  | 0.264     | 0.991     | 0.263     | 0.016 |
| $Sm^-$  | 0.075 | 0.485  | 0.262     | 0.993     | 0.262     | 0.011 |
| $Sm^-$  | 0.078 | 0.502  | 0.277     | 0.995     | 0.276     | 0.035 |
| $Sm^-$  | 0.079 | 0.508  | 0.281     | 0.996     | 0.281     | 0.034 |
| $Col^-$ | 0.080 | 0.533  | 0.891     | 0.988     | 0.886     | 0.855 |
| $Col^-$ | 0.090 | 0.572  | 0.969     | 0.988     | 0.965     | 0.960 |
| $Col^-$ | 0.095 | 0.589  | 0.978     | 0.989     | 0.974     | 0.971 |
| K       | 0.100 | 0.608  | 0.985     | 0.995     | 0.982     | 0.979 |
| K       | 0.200 | 0.753  | 0.996     | 0.999     | 0.995     | 0.994 |

**Table 24. Reduced pressure, packing fraction, uniaxial and biaxial order parameters of HBPs with  $L^*=12$  and  $W^*=8$ . Absolute errors are lower than  $5 \cdot 10^{-3}$**

| Phase   | $P^*$ | $\eta$ | $S_{2,L}$ | $S_{2,T}$ | $S_{2,W}$ | $B_2$ |
|---------|-------|--------|-----------|-----------|-----------|-------|
| I       | 0.010 | 0.168  | 0.033     | 0.045     | 0.029     | 0.004 |
| I       | 0.015 | 0.205  | 0.0434    | 0.072     | 0.039     | 0.041 |
| $N^-$   | 0.017 | 0.222  | 0.068     | 0.120     | 0.058     | 0.007 |
| $N^-$   | 0.018 | 0.236  | 0.178     | 0.612     | 0.168     | 0.016 |
| $N^-$   | 0.02  | 0.257  | 0.222     | 0.795     | 0.211     | 0.02  |
| $N^-$   | 0.04  | 0.367  | 0.256     | 0.964     | 0.255     | 0.012 |
| $N^-$   | 0.050 | 0.412  | 0.259     | 0.977     | 0.258     | 0.013 |
| $N^-$   | 0.055 | 0.432  | 0.267     | 0.984     | 0.266     | 0.012 |
| $Sm^-$  | 0.060 | 0.455  | 0.273     | 0.988     | 0.272     | 0.017 |
| $Sm^-$  | 0.070 | 0.515  | 0.281     | 0.997     | 0.282     | 0.020 |
| $Sm^-$  | 0.075 | 0.543  | 0.273     | 0.998     | 0.273     | 0.020 |
| $Sm^-$  | 0.078 | 0.551  | 0.268     | 0.981     | 0.268     | 0.013 |
| $Col^-$ | 0.079 | 0.569  | 0.947     | 0.989     | 0.945     | 0.931 |
| $Col^-$ | 0.080 | 0.577  | 0.973     | 0.989     | 0.971     | 0.967 |
| $Col^-$ | 0.085 | 0.586  | 0.969     | 0.985     | 0.975     | 0.968 |
| $Col^-$ | 0.088 | 0.599  | 0.980     | 0.986     | 0.977     | 0.977 |
| K       | 0.090 | 0.614  | 0.985     | 0.995     | 0.983     | 0.980 |
| K       | 0.100 | 0.637  | 0.987     | 0.997     | 0.986     | 0.983 |



**Table 25. Reduced pressure, packing fraction, uniaxial and biaxial order parameters of HBPs with  $L^*=12$  and  $W^*=10$ . Absolute errors are lower than  $5 \cdot 10^{-3}$**

| Phase   | $P^*$ | $\eta$ | $S_{2,L}$ | $S_{2,T}$ | $S_{2,W}$ | $B_2$ |
|---------|-------|--------|-----------|-----------|-----------|-------|
| I       | 0.011 | 0.198  | 0.0772    | 0.202     | 0.067     | 0.001 |
| $N^-$   | 0.012 | 0.215  | 0.147     | 0.515     | 0.146     | 0.01  |
| $N^-$   | 0.020 | 0.392  | 0.245     | 0.908     | 0.244     | 0.017 |
| $N^-$   | 0.030 | 0.361  | 0.257     | 0.959     | 0.257     | 0.015 |
| $N^-$   | 0.040 | 0.416  | 0.262     | 0.979     | 0.261     | 0.018 |
| $Col^-$ | 0.043 | 0.439  | 0.265     | 0.985     | 0.265     | 0.021 |
| $Col^-$ | 0.045 | 0.458  | 0.268     | 0.986     | 0.268     | 0.026 |
| $Col^-$ | 0.050 | 0.496  | 0.273     | 0.991     | 0.273     | 0.032 |
| $Col^-$ | 0.080 | 0.631  | 0.984     | 0.995     | 0.983     | 0.979 |
| $Col^-$ | 0.090 | 0.656  | 0.989     | 0.996     | 0.988     | 0.986 |
| K       | 0.095 | 0.672  | 0.989     | 0.998     | 0.989     | 0.987 |
| K       | 0.100 | 0.685  | 0.991     | 0.998     | 0.990     | 0.987 |

**Table 26. Reduced pressure, packing fraction, uniaxial and biaxial order parameters of HBPs with  $L^*=12$  and  $W^*=12$ . Absolute errors are lower than  $5 \cdot 10^{-3}$**

| Phase   | $P^*$ | $\eta$ | $S_{2,L}$ | $S_{2,T}$ | $S_{2,W}$ | $B_2$ |
|---------|-------|--------|-----------|-----------|-----------|-------|
| I       | 0.005 | 0.137  | 0.031     | 0.04      | 0.030     | 0.001 |
| I       | 0.007 | 0.168  | 0.044     | 0.09      | 0.046     | 0.010 |
| I       | 0.008 | 0.183  | 0.075     | 0.225     | 0.084     | 0.015 |
| $N^-$   | 0.009 | 0.206  | 0.193     | 0.703     | 0.190     | 0.011 |
| $N^-$   | 0.010 | 0.221  | 0.246     | 0.797     | 0.216     | 0.016 |
| $N^-$   | 0.015 | 0.280  | 0.245     | 0.915     | 0.245     | 0.015 |
| $N^-$   | 0.020 | 0.324  | 0.253     | 0.947     | 0.253     | 0.015 |
| $N^-$   | 0.030 | 0.399  | 0.265     | 0.981     | 0.265     | 0.020 |
| $CoI^-$ | 0.033 | 0.426  | 0.262     | 0.984     | 0.262     | 0.018 |
| $CoI^-$ | 0.040 | 0.500  | 0.258     | 0.989     | 0.258     | 0.013 |
| $CoI^-$ | 0.060 | 0.604  | 0.977     | 0.993     | 0.979     | 0.988 |
| $CoI^-$ | 0.070 | 0.642  | 0.986     | 0.995     | 0.987     | 0.992 |
| K       | 0.075 | 0.661  | 0.989     | 0.997     | 0.989     | 0.994 |
| K       | 0.080 | 0.675  | 0.990     | 0.998     | 0.989     | 0.995 |
| K       | 0.090 | 0.701  | 0.992     | 0.999     | 0.991     | 0.996 |
| K       | 0.100 | 0.721  | 0.993     | 0.999     | 0.997     | 0.997 |

**Figure 1.** Equation of state  $\eta$  vs  $P^*$  of HBPs of length  $L^*=9$  at different values of the reduced width. Symbols indicate the simulation results, while dashed lines are theoretical predictions assuming biaxial particles. Solid lines are guides for the eye.

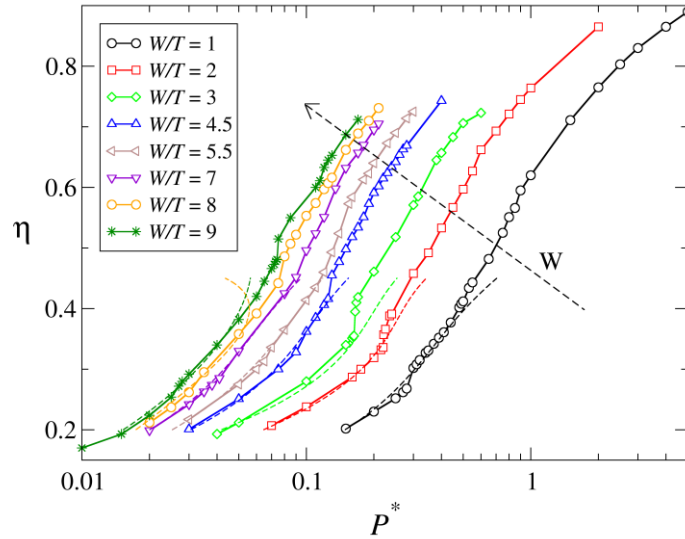

**Figure 2.** Equation of state  $\eta$  vs  $P^*$  of HBPs of length  $L^*=12$  at different values of the reduced width. Symbols indicate the simulation results, while dashed lines are theoretical predictions assuming biaxial particles. Solid lines are guides for the eye.

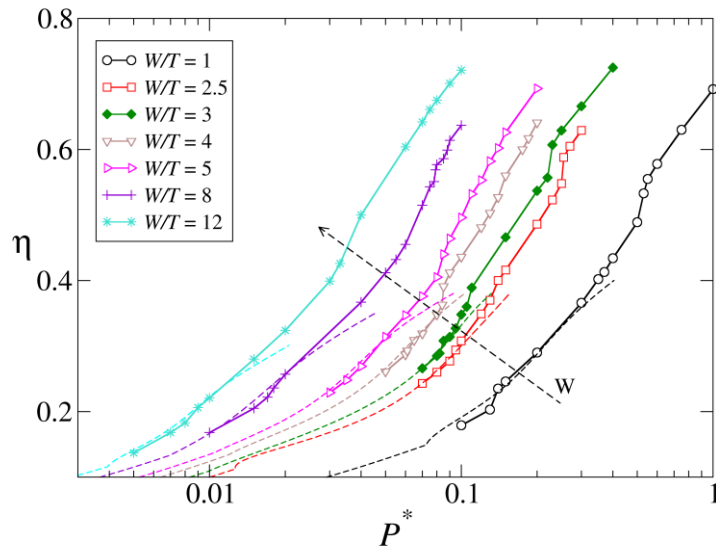

Supplement: c7sm00726d1.pdf [file c7sm00726d1.pdf]
